# Supplementary material for: Cross-Linking of Polypropylene with Thiophene and Imidazole
Source: MDPI journal article supplement (doi:10.3390/polym14112198), 2022-05-28
Supplement: s1 [file s1]

## Supporting Information

Article

# Cross-Linking of Polypropylene with Thiophene and Imidazole

Henky Muljana <sup>1,2,\*</sup>, Klaas Remerie <sup>3</sup>, Gert Boven <sup>3</sup>, Francesco Picchioni <sup>2</sup> and Ranjita K. Bose <sup>2,\*</sup>

<sup>1</sup> Department of Chemical Engineering, Parahyangan Catholic University, Ciumbuleuit 94, Bandung 40141, Indonesia

<sup>2</sup> Department of Chemical Engineering, ENTEG, University of Groningen, Nijenborgh 4, 9747 AG Groningen, The Netherlands; f.picchioni@rug.nl

<sup>3</sup> SABIC, Plasticslaan 1, P.O. Box 117, 4600 AC Bergen op Zoom, The Netherlands; k.remerie@home.nl (K.R.); gert.boven@sabic.com (G.B.)

\* Correspondence: henky@unpar.ac.id (H.M.); r.k.bose@rug.nl (R.K.B.)

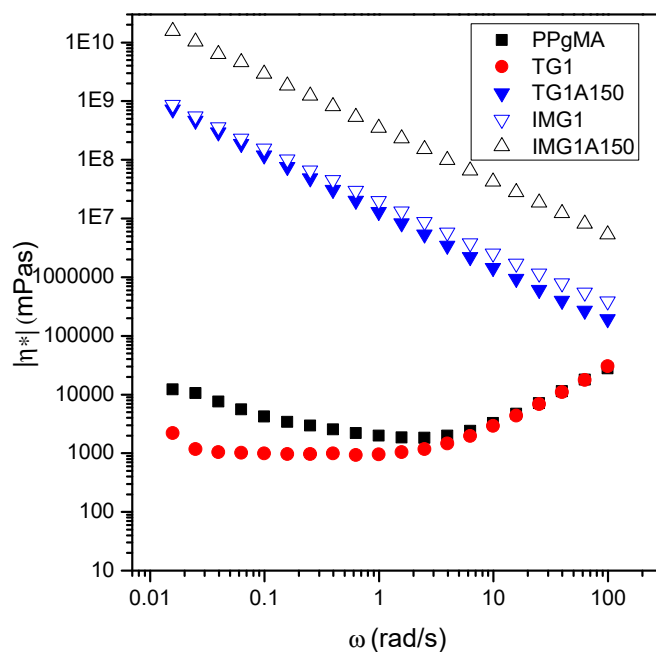

Figure S1. The change in complex viscosity ( $|\eta^*|$ ) of the cross-linked products at various angular frequency ( $\omega$ , rad/s) and measured at temperature of 160 °C.
